# Supplementary material for: Decoding Structural Properties of a Partially Unfolded Protein Substrate: En Route to Chaperone Binding
Source: PLOS journal article supplement (doi:10.1371/journal.pcbi.1004496), 2015-09-22
Supplement: S1 (10.1371/journal.pcbi.1004496.s001) [file journal.pcbi.1004496.s001]

S1 Table: List of significant hydrophobic patches

| Structure      | Number of patches | Residue contribution                                                                                          | Patch size ( $\text{\AA}^2$ ) |
|----------------|-------------------|---------------------------------------------------------------------------------------------------------------|-------------------------------|
| Native         | 1                 | 1, 2, 3, 71, 72, 98, 129, 155, 156, 158, 182                                                                  | 350                           |
|                | 2                 | 44, 47, 49, 50, 138, 246, 247, 249, 250, 270, 271                                                             | 313                           |
| I <sub>1</sub> | 1                 | 11, 13, 15, 16, 17, 19, 44, 47, 48, 56, 58, 59, 244, 246, 247, 248, 249, 250, 254, 266, 267, 268, 269, 271    | 830                           |
|                | 2                 | 107, 108, 109, 110, 111, 112, 113, 140, 142, 144, 145, 146                                                    | 487                           |
|                | 3                 | 245, 259, 278, 280, 281, 283, 284, 287, 292                                                                   | 418                           |
|                | 4                 | 43, 49, 50, 51, 101, 103, 104, 133, 135, 136, 137, 138, 163, 164, 166                                         | 355                           |
| I <sub>2</sub> | 1                 | 2, 4, 6, 37, 38, 70, 71, 72, 74, 90, 92, 93, 94, 96, 97, 98, 126, 127, 128, 129, 131, 156, 158, 182, 184, 202 | 770                           |
|                | 2                 | 258, 259, 260, 262, 264, 265, 267, 269, 270, 271, 272, 273, 274, 275                                          | 580                           |
|                | 3                 | 187, 189, 190, 192, 193, 194, 195, 196, 223, 224, 226, 227, 234, 237, 238, 240                                | 490                           |
|                | 4                 | 106, 107, 108, 139, 140, 143, 144, 145, 146, 166, 168, 169, 172                                               | 420                           |
|                | 5                 | 53, 84, 87, 88, 89, 115, 116, 117, 118, 119                                                                   | 350                           |
